# Supplementary material for: Differential impact of dual-active ingredient long-lasting insecticidal nets on primary malaria vectors: a secondary analysis of a 3-year, single-blind, cluster-randomised controlled trial in rural Tanzania
Source: PubMed Central journal article supplement (PMC10186178; doi:10.1016/s2542-5196(23)00048-7), 2023-05-08
Supplement: mmc1.pdf [file mmc1.pdf]

### Supplementary appendix

This appendix formed part of the original submission and has been peer reviewed. We post it as supplied by the authors.

Supplement to: Matowo NS, Kulkarni MA, Messenger LA, et al. Differential impact of dual-active ingredient long-lasting insecticidal nets on primary malaria vectors: a secondary analysis of a 3-year, single-blind, cluster-randomised controlled trial in rural Tanzania. *Lancet Planet Health* 2023; 7: e370–80

**Differential impact of dual-active ingredient long-lasting insecticidal nets (LLINs) on primary malaria vectors: a secondary analysis of a three-year cluster-randomized controlled trial in rural Tanzania**

Nancy S. Matowo PhD, Manisha A. Kulkarni PhD, Louisa A. Messenger PhD, Mohamed Jumanne BSc, Jackline Martin MSc, Elizabeth Mallya BSc, Eliud Lukole MSc, Jacklin F. Mosha PhD, Oliva Moshi BSc, Boniface Shirima BSc, Robert Kaaya MSc, Professor Mark Rowland PhD, Alphaxard Manjurano PhD, Professor Franklin W Mosha PhD, Natacha Protopopoff PhD

**SUPPLEMENTARY APPENDIX**

## Contents

|                                                                                                  |   |
|--------------------------------------------------------------------------------------------------|---|
| S1: Trends in female Anopheles species density distribution over time across the study arm ..... | 3 |
| S2: Per protocol analysis.....                                                                   | 4 |
| S3: Effect of dual-LLINs on non-malaria vectors.....                                             | 5 |
| S4: Trends in female Culex species density distribution over time across the study arm.....      | 6 |
| S5: Spatial differences of effectiveness of dual-AI LLINs.....                                   | 7 |
| S6: Anopheles species composition .....                                                          | 8 |
| S7: Maxent model .....                                                                           | 9 |

### S1: Trends in female *Anopheles* species density distribution over time across the study arm

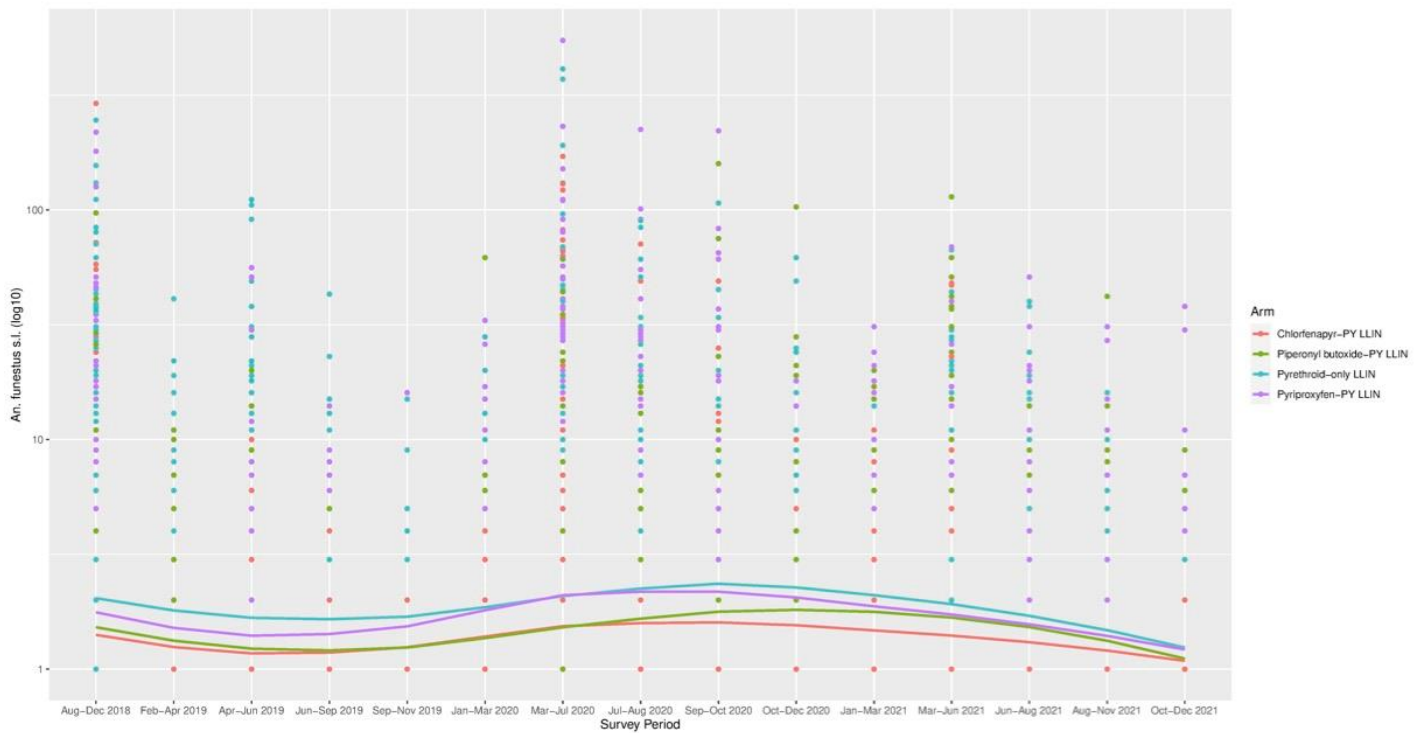

Trends of *An. funestus* population density distribution with smoothed averages over time across the treatment allocation arms defined as the orange (Chlorfenapyr-PY LLIN), green (Piperonyl butoxide-PY LLIN), blue (Pyriproxyfen-PY LLIN), and purple (Standard-Pyrethroid LLIN) with their respective 95% confidence intervals portrayed as grey shading. The plots were generated in R version 4.1.3 (R Development Core Team) using the “ggplot” packages.

## S2: Per protocol analysis

Table: Post hoc per protocol analysis showing differential effects of the dual-LLINs compared to standard-PY LLIN on *Anopheles* species at 12, 24, 36 months, and combined after intervention

|                                   | Number of households analysed | Total <i>Anopheles funestus s.l.</i> | Density / night/ HH | DR   | 95%CI     | p value* | Total <i>Anopheles gambiae s.l.</i> | Density / night/ HH | DR   | 95%CI     | p value* |
|-----------------------------------|-------------------------------|--------------------------------------|---------------------|------|-----------|----------|-------------------------------------|---------------------|------|-----------|----------|
| <b>Year 1: 2019</b>               |                               |                                      |                     |      |           |          |                                     |                     |      |           |          |
| Pyrethroid-only LLIN arm (ref)    | 511                           | 1131                                 | 2.2                 | 1    |           |          | 247                                 | 0.5                 | 1    |           |          |
| Chlorfenapyr-PY LLIN arm          | 519                           | 102                                  | 0.2                 | 0.17 | 0.08-0.34 | <0.0001  | 229                                 | 0.4                 | 0.78 | 0.37-1.65 | 0.5172   |
| Piperonyl butoxide-PY LLIN arm    | 510                           | 228                                  | 0.4                 | 0.40 | 0.20-0.80 | 0.0088   | 184                                 | 0.4                 | 0.63 | 0.30-1.34 | 0.2287   |
| Pyriproxyfen-PY LLIN arm          | 525                           | 473                                  | 0.9                 | 0.65 | 0.34-1.27 | 0.2062   | 216                                 | 0.4                 | 0.73 | 0.35-1.55 | 0.4170   |
| <b>Year 2: 2020</b>               |                               |                                      |                     |      |           |          |                                     |                     |      |           |          |
| Pyrethroid-only LLIN arm (ref)    | 596                           | 3309                                 | 5.6                 | 1    |           |          | 1743                                | 2.9                 | 1    |           |          |
| Chlorfenapyr-PY LLIN arm          | 574                           | 1519                                 | 2.6                 | 0.28 | 0.16-0.51 | <0.0001  | 2520                                | 4.4                 | 0.99 | 0.52-1.88 | 0.9767   |
| Piperonyl butoxide-PY LLIN arm    | 458                           | 938                                  | 2.0                 | 0.48 | 0.27-0.87 | 0.0151   | 1374                                | 3.0                 | 1.13 | 0.60-2.17 | 0.6959   |
| Pyriproxyfen-PY LLIN arm          | 520                           | 3619                                 | 7.0                 | 0.76 | 0.42-1.35 | 0.3450   | 1634                                | 3.1                 | 1.07 | 0.56-2.04 | 0.8325   |
| <b>Year 3: 2021</b>               |                               |                                      |                     |      |           |          |                                     |                     |      |           |          |
| Pyrethroid-only LLIN arm (ref)    | 430                           | 1007                                 | 2.3                 | 1    |           |          | 403                                 | 0.9                 | 1    |           |          |
| Chlorfenapyr-PY LLIN arm          | 425                           | 433                                  | 1.0                 | 0.30 | 0.16-0.55 | <0.0001  | 542                                 | 1.3                 | 0.86 | 0.43-1.72 | 0.6649   |
| Piperonyl butoxide-PY LLIN arm    | 235                           | 502                                  | 2.1                 | 0.62 | 0.31-1.21 | 0.1598   | 121                                 | 0.5                 | 0.62 | 0.28-1.35 | 0.2251   |
| Pyriproxyfen-PY LLIN arm          | 320                           | 809                                  | 2.5                 | 0.72 | 0.38-1.36 | 0.3069   | 418                                 | 1.3                 | 0.85 | 0.41-1.77 | 0.6650   |
| <b>Overall (3 years combined)</b> |                               |                                      |                     |      |           |          |                                     |                     |      |           |          |
| Pyrethroid-only LLIN arm (ref)    | 1537                          | 5447                                 | 3.5                 | 1    |           |          | 2393                                | 1.6                 | 1    |           |          |
| Chlorfenapyr-PY LLIN arm          | 1518                          | 2054                                 | 1.4                 | 0.25 | 0.16-0.39 | <0.0001  | 3291                                | 2.2                 | 0.88 | 0.57-1.34 | 0.6464   |
| Piperonyl butoxide-PY LLIN arm    | 1203                          | 1668                                 | 1.4                 | 0.50 | 0.32-0.77 | 0.0019   | 1679                                | 1.4                 | 0.82 | 0.53-1.27 | 0.3738   |
| Pyriproxyfen-PY LLIN arm          | 1365                          | 4901                                 | 3.6                 | 0.72 | 0.47-1.11 | 0.1357   | 2268                                | 1.7                 | 0.90 | 0.59-1.39 | 0.5369   |

The intervention arm is compared to the standard-PY LLIN arm at each time point. LLIN=long-lasting insecticidal net. PY=Pyrethroid. DR=Density reduction ratio. DRs are adjusted for baseline cluster-level variables used in restricted randomization. \*EIR are weighted to account for the proportion of mosquitoes sampled to be tested for sporozoites. We have applied a Bonferroni correction for multiplicity given the multiple comparison arms and \*a p value <0.017 was considered statistically significant.

### S3: Effect of dual-LLINs on non-malaria vectors

Table: Effect of dual-LLINs compared with the standard-PY LLIN on non-malaria vectors

|                                           | Number of households analysed | Female <i>Culex</i> species collected | Density / night/ HH | DR   | 95%CI     | p value* | Total all mosquito collected | Density / night/ HH | DR   | 95%CI     | p value* |
|-------------------------------------------|-------------------------------|---------------------------------------|---------------------|------|-----------|----------|------------------------------|---------------------|------|-----------|----------|
| <b>Year 1: 2019</b>                       |                               |                                       |                     |      |           |          |                              |                     |      |           |          |
| Pyrethroid-only LLIN arm (ref)            | 670                           | 6630                                  | 9.9                 | 1    |           |          | 9100                         | 13.6                | 1    |           |          |
| Chlorfenapyr-PY LLIN arm                  | 671                           | 3741                                  | 6.2                 | 0.36 | 0.20-0.66 | 0.0009   | 4937                         | 7.4                 | 0.36 | 0.22-0.61 | 0.0001   |
| Piperonyl butoxide-PY LLIN arm            | 672                           | 3820                                  | 5.7                 | 0.66 | 0.36-1.19 | 0.1634   | 4738                         | 7.1                 | 0.56 | 0.34-0.92 | 0.0237   |
| Pyriproxyfen-PY LLIN arm                  | 672                           | 3741                                  | 5.6                 | 0.53 | 0.29-0.96 | 0.0359   | 5378                         | 8.0                 | 0.55 | 0.33-0.91 | 0.0206   |
| <b>Year 2: 2020</b>                       |                               |                                       |                     |      |           |          |                              |                     |      |           |          |
| Pyrethroid-only LLIN arm (ref)            | 838                           | 13909                                 | 16.6                | 1    |           |          | 21640                        | 25.8                | 1    |           |          |
| Chlorfenapyr-PY LLIN arm                  | 840                           | 15541                                 | 18.5                | 0.58 | 0.33-1.01 | 0.0535   | 22162                        | 26.4                | 0.51 | 0.32-0.82 | 0.0053   |
| Piperonyl butoxide-PY LLIN arm            | 840                           | 8780                                  | 10.5                | 0.50 | 0.29-0.85 | 0.0115   | 13421                        | 16.0                | 0.52 | 0.32-0.83 | 0.0058   |
| Pyriproxyfen-PY LLIN arm                  | 840                           | 12639                                 | 15.0                | 0.50 | 0.29-0.86 | 0.0128   | 21553                        | 25.7                | 0.59 | 0.37-0.95 | 0.0283   |
| <b>Year 3: 2021</b>                       |                               |                                       |                     |      |           |          |                              |                     |      |           |          |
| Pyrethroid-only arm LLIN (ref)            | 840                           | 10027                                 | 11.9                | 1    |           |          | 13431                        | 16.0                | 1    |           |          |
| Chlorfenapyr-PY LLIN arm                  | 840                           | 7941                                  | 9.5                 | 0.60 | 0.34-1.05 | 0.0748   | 10653                        | 12.7                | 0.49 | 0.30-0.79 | 0.0036   |
| Piperonyl butoxide-PY LLIN arm            | 840                           | 5773                                  | 6.9                 | 0.72 | 0.42-1.26 | 0.2516   | 8226                         | 9.8                 | 0.60 | 0.38-0.96 | 0.0341   |
| Pyriproxyfen-PY LLIN arm                  | 840                           | 8312                                  | 9.9                 | 0.94 | 0.54-1.64 | 0.8395   | 11697                        | 13.9                | 0.74 | 0.46-1.19 | 0.2172   |
| <b>Overall (all three years combined)</b> |                               |                                       |                     |      |           |          |                              |                     |      |           |          |
| Pyrethroid-only LLIN arm (ref)            | 2348                          | 30566                                 | 13.0                | 1    |           |          | 44171                        | 18.8                | 1    |           |          |
| Chlorfenapyr-PY LLIN arm                  | 2351                          | 27627                                 | 11.8                | 0.52 | 0.33-0.81 | 0.0037   | 37752                        | 16.1                | 0.46 | 0.31-0.67 | <0.0001  |
| Piperonyl butoxide-PY LLIN arm            | 2352                          | 18373                                 | 7.8                 | 0.61 | 0.39-0.95 | 0.0273   | 26385                        | 11.2                | 0.56 | 0.38-0.81 | 0.0020   |
| Pyriproxyfen-PYLLIN arm                   | 2352                          | 24692                                 | 10.5                | 0.63 | 0.41-0.99 | 0.0431   | 38628                        | 16.4                | 0.63 | 0.43-0.92 | 0.0150   |

The intervention arm is compared to the standard-PY LLIN arm at each time point. LLIN=long-lasting insecticidal net. PY=Pyrethroid. DR=Density reduction ratio. DRs are adjusted for baseline cluster-level variables used in restricted randomization. \*EIR are weighted to account for the proportion of mosquitoes sampled to be tested for sporozoites. We have applied a Bonferroni correction for multiplicity given the multiple comparison arms and \*a p value <0.017 was considered statistically significant.

#### S4: Trends in female *Culex* species density distribution over time across the study arm

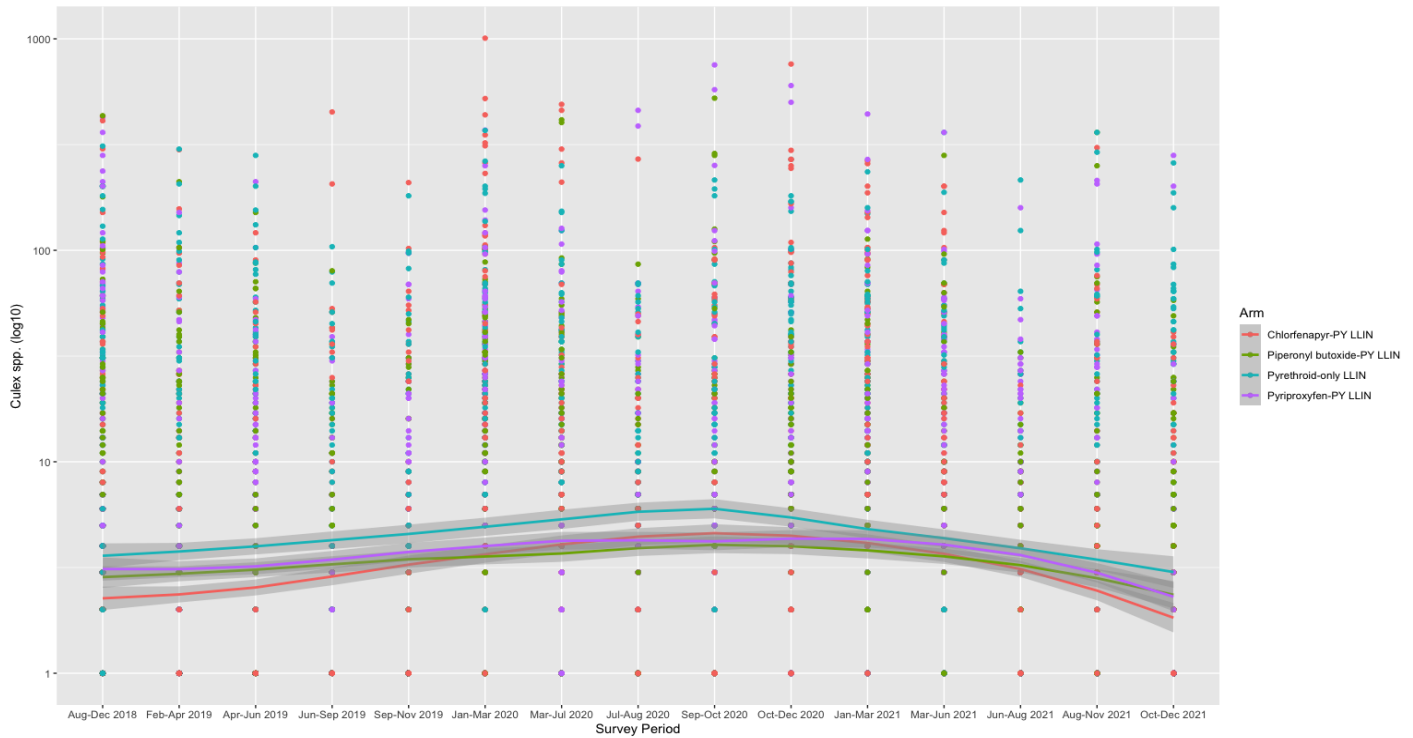

Plots showing smoothed averages female *Culex* population density over time across the treatment allocation arms defined as the orange (Chlorfenapyr-PY LLIN), green (Piperonyl butoxide-PY LLIN), blue (Pyriproxyfen-PY LLIN), and purple (Standard-Pyrethroid LLIN) with their respective 95% confidence intervals portrayed as grey shading. The plots were generated in R version 4.1.3 (R Development Core Team) using the “ggplot” packages

### S5: Spatial differences of effectiveness of dual-AI LLINs

Table: Spatial heterogeneity of effectiveness of dual-AI LLINs on malaria vectors species

|                                | Number of households analysed | An. vector species | Density / night/ HH | DR   | 95%CI     | p value** | <i>An. funestus s.l</i> | Density / night/ HH | RR   | 95%CI     | p value** | <i>An. gambiae s.l</i> | Density / night/ HH | DR   | 95%CI     | p value** |
|--------------------------------|-------------------------------|--------------------|---------------------|------|-----------|-----------|-------------------------|---------------------|------|-----------|-----------|------------------------|---------------------|------|-----------|-----------|
| <b>Southern clusters</b>       |                               |                    |                     |      |           |           |                         |                     |      |           |           |                        |                     |      |           |           |
| Pyrethroid-only LLIN arm (ref) | 1118                          | 7643               | 6.8                 | 1    |           |           | 5801                    | 5.2                 | 1    |           |           | 1842                   | 1.7                 | 1    |           |           |
| Chlorfenapyr-PY LLIN arm       | 1008                          | 3353               | 4.3                 | 0.30 | 0.19-0.50 | <0.0001   | 1685                    | 2.2                 | 0.21 | 0.12-0.38 | <0.0001   | 1668                   | 2.1                 | 0.63 | 0.33-1.20 | 0.4301    |
| Piperonyl butoxide-PY LLIN arm | 784                           | 2953               | 3.8                 | 0.46 | 0.27-0.80 | 0.0057    | 1992                    | 2.5                 | 0.45 | 0.24-0.86 | 0.0152    | 961                    | 1.2                 | 0.72 | 0.35-1.49 | 0.3825    |
| Pyriproxyfen-PY LLIN arm       | 783                           | 7433               | 7.4                 | 0.47 | 0.25-0.90 | 0.0229    | 5483                    | 5.4                 | 0.45 | 0.21-0.97 | 0.0420    | 1950                   | 1.9                 | 0.71 | 0.30-1.67 | 0.1565    |
| <b>Northern clusters</b>       |                               |                    |                     |      |           |           |                         |                     |      |           |           |                        |                     |      |           |           |
| Pyrethroid-only LLIN arm (ref) | 1230                          | 2650               | 2.2                 | 1    |           |           | 1503                    | 1.2                 | 1    |           |           | 1147                   | 0.9                 | 1    |           |           |
| Chlorfenapyr-PY LLIN arm       | 1568                          | 3828               | 2.4                 | 0.60 | 0.39-0.93 | 0.0213    | 1213                    | 0.8                 | 0.37 | 0.22-0.63 | <0.0001   | 2615                   | 1.7                 | 0.93 | 0.53-1.66 | 0.8158    |
| Piperonyl butoxide-PY LLIN arm | 1568                          | 3225               | 2.1                 | 0.67 | 0.44-1.02 | 0.0594    | 1329                    | 0.9                 | 0.54 | 0.33-0.88 | 0.0141    | 1896                   | 1.2                 | 0.88 | 0.50-1.53 | 0.6421    |
| Pyriproxyfen-PY LLIN arm       | 1344                          | 3520               | 2.6                 | 1.22 | 0.78-1.89 | 0.3873    | 1657                    | 1.2                 | 1.15 | 0.68-1.94 | 0.6117    | 1863                   | 1.4                 | 1.33 | 0.74-2.40 | 0.3378    |

The intervention arm is compared to the standard-PY LLIN arm at each time point. LLIN=long-lasting insecticidal net. PY=Pyrethroid. DR=Density reduction ratio. DRs are adjusted for baseline cluster-level variables used in restricted randomization. \*EIR are weighted to account for the proportion of mosquitoes sampled to be tested for sporozoites. We have applied a Bonferroni correction for multiplicity given the multiple comparison arms and \*a p value <0.017 was considered statistically significant.



## S6: Anopheles species composition

The figure shows Anopheles sibling species composition at baseline and each time point post-intervention

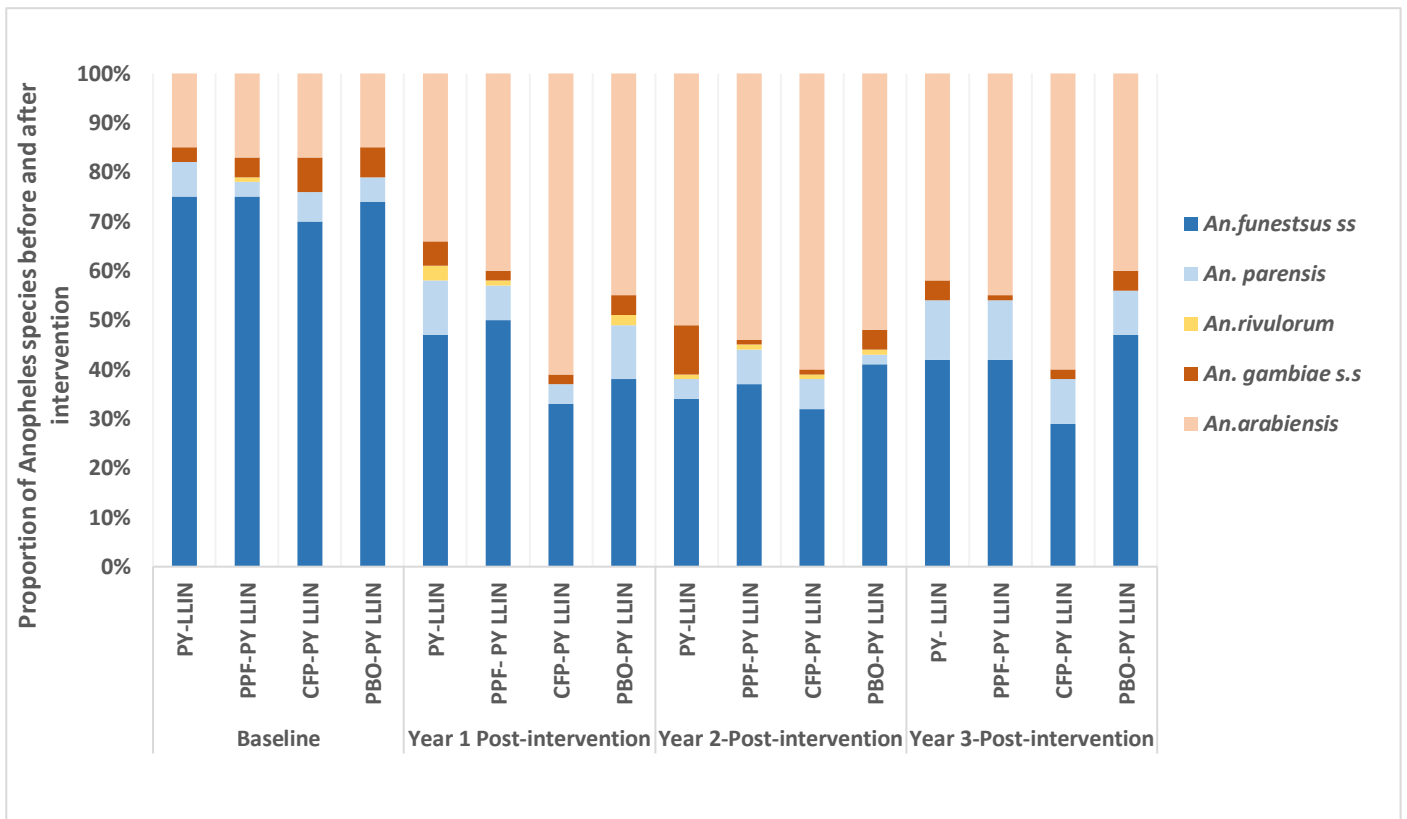

## S7: Maxent model

**Table:** Model validation statistics for Maxent species distribution models of *An. funestus* and *An. arabiensis* comparing pilot predicted species distribution to post-intervention species occurrence by study arm and year.

| Species             | Validation test dataset | Arm                            | AUC   | Standard error of AUC | Fractional predicted area | Test omission rate |
|---------------------|-------------------------|--------------------------------|-------|-----------------------|---------------------------|--------------------|
| <i>An. funestus</i> | Baseline                | n/a                            | 0.788 | 0.017                 | 0.59                      | 0.078              |
|                     | Year 1                  | Pyrethroid-only LLIN arm (ref) | 0.809 | 0.014                 | 0.59                      | 0.075              |
|                     | Year 1                  | Chlorfenapyr-PY LLIN arm       | 0.792 | 0.019                 | 0.59                      | 0.038              |
|                     | Year 1                  | Pyriproxyfen-PY LLIN arm       | 0.852 | 0.013                 | 0.59                      | 0.045              |
|                     | Year 1                  | Piperonyl butoxide-PY LLIN arm | 0.874 | 0.011                 | 0.59                      | 0.018              |
|                     | Year 2                  | Pyrethroid-only LLIN arm (ref) | 0.781 | 0.011                 | 0.59                      | 0.086              |
|                     | Year 2                  | Chlorfenapyr-PY LLIN arm       | 0.759 | 0.012                 | 0.59                      | 0.061              |
|                     | Year 2                  | Pyriproxyfen-PY LLIN arm       | 0.835 | 0.01                  | 0.59                      | 0.044              |
|                     | Year 2                  | Piperonyl butoxide-PY LLIN arm | 0.875 | 0.007                 | 0.59                      | 0.011              |
|                     | <i>An. arabiensis</i>   | Baseline                       | n/a   | 0.8                   | 0.023                     | 0.684              |
| Year 1              |                         | Pyrethroid-only LLIN arm (ref) | 0.812 | 0.023                 | 0.684                     | 0.058              |
| Year 1              |                         | Chlorfenapyr-PY LLIN arm       | 0.734 | 0.026                 | 0.684                     | 0.029              |
| Year 1              |                         | Pyriproxyfen-PY LLIN arm       | 0.729 | 0.023                 | 0.684                     | 0.014              |
| Year 1              |                         | Piperonyl butoxide-PY LLIN arm | 0.747 | 0.024                 | 0.684                     | 0                  |
| Year 2              |                         | Pyrethroid-only LLIN arm (ref) | 0.73  | 0.019                 | 0.684                     | 0.051              |
| Year 2              |                         | Chlorfenapyr-PY LLIN arm       | 0.731 | 0.02                  | 0.684                     | 0.079              |
| Year 2              |                         | Pyriproxyfen-PY LLIN arm       | 0.756 | 0.017                 | 0.684                     | 0.021              |
| Year 2              |                         | Piperonyl butoxide-PY LLIN arm | 0.708 | 0.02                  | 0.684                     | 0.081              |

The fractional predicted area and test omission rate are based on the minimum training presence threshold (0.102 for *An. funestus* and 0.155 for *An. arabiensis*). A p-value<0.05 indicates that test points are better predicted by the model than by random prediction with the same fractional predicted area.
